# Supplementary material
Source: Springer Nature journal article supplement (https://www.springermedizin.de/resource/supplementary/12985_2013_2240_MOESM1_ESM.pdf/9606346)

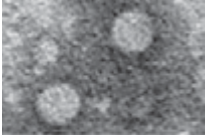

**Sing-M105-02 virus**

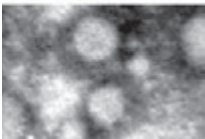

**Sing-M100-02 virus**

---

100 nm

Supplement: MOESM1 [file 9606346]
